# Supplementary material
Source: publisher figshare collection journal article supplement (https://acs.figshare.com/ndownloader/files/3724615)
Supplement: Supplementary file 1 [file 3724615]

# Enhanced transparency through second phase crystallization in $\text{BaAl}_4\text{O}_7$ scintillating ceramics

Marina Boyer<sup>\*,a</sup>, Salaheddine Alahraché<sup>a</sup>, Cécile Genevois<sup>a</sup>, Marina Licheron<sup>a</sup>, François-Xavier Lefevre<sup>b</sup>, Célia Castro<sup>c</sup>, Guillaume Bonnefont<sup>d</sup>, Gaël Patton<sup>e</sup>, Federico Moretti<sup>e</sup>, Christophe Dujardin<sup>e</sup>, Guy Matzen<sup>a</sup> and Mathieu Allix<sup>\*,a</sup>

## SUPPLEMENTARY INFORMATIONS

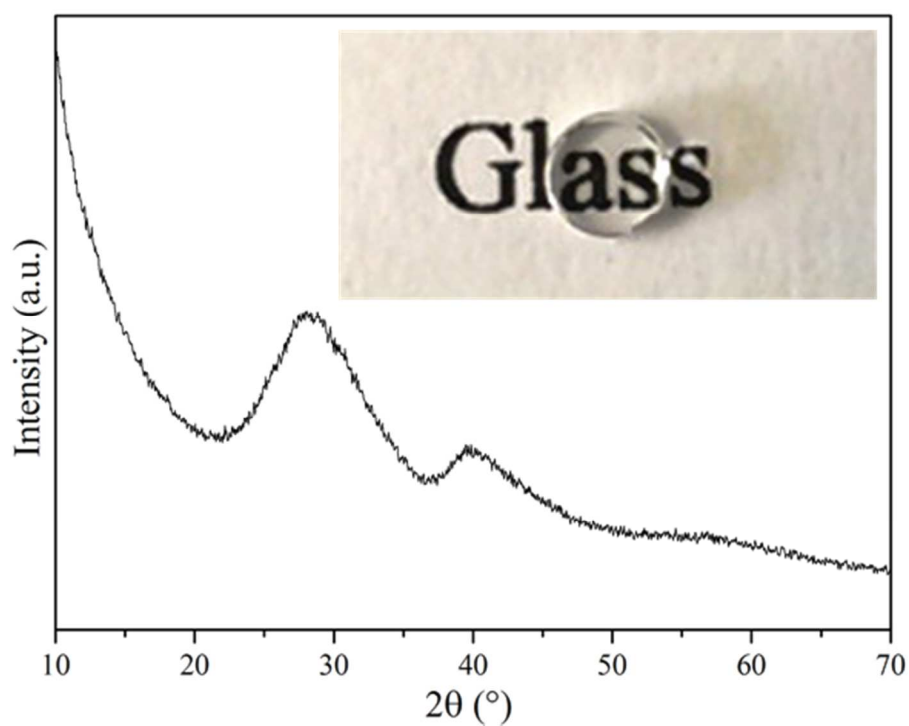

**Figure S11:** XRD pattern of the 35BaO-65Al<sub>2</sub>O<sub>3</sub> glass confirming its amorphousness. The photography of the corresponding glass is in inset.

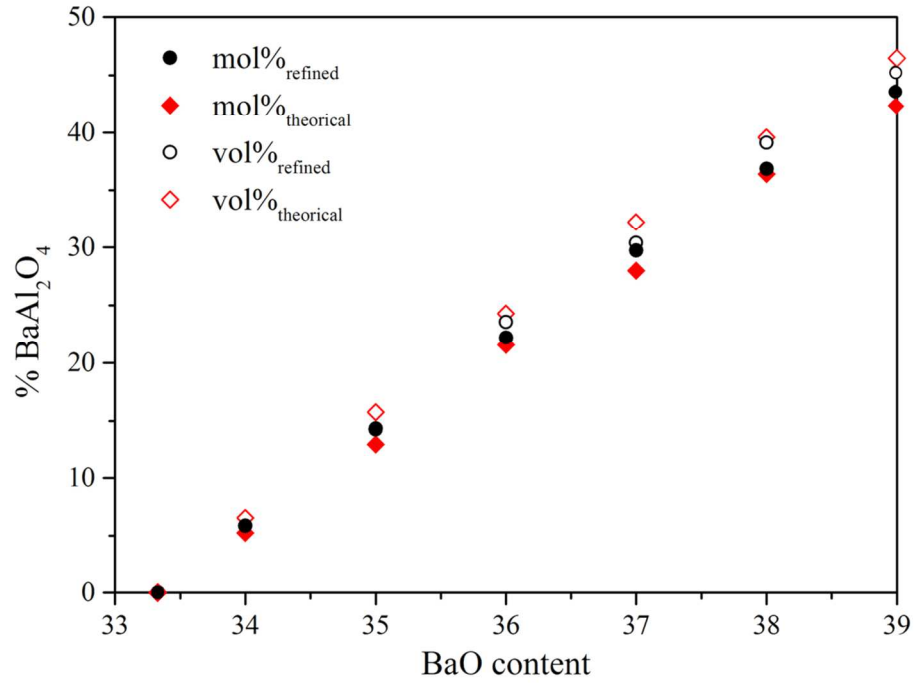

**Figure S12:** Quantification of the  $\text{BaAl}_2\text{O}_4$  contents in the studied biphasic  $\text{BaAl}_4\text{O}_7$  -  $\text{BaAl}_2\text{O}_4$  transparent polycrystalline ceramics. Both molar and volume fractions are represented. The values are obtained from Rietveld refinements performed on powder X-ray diffraction data and compared to the theoretical values deduced from nominal compositions.

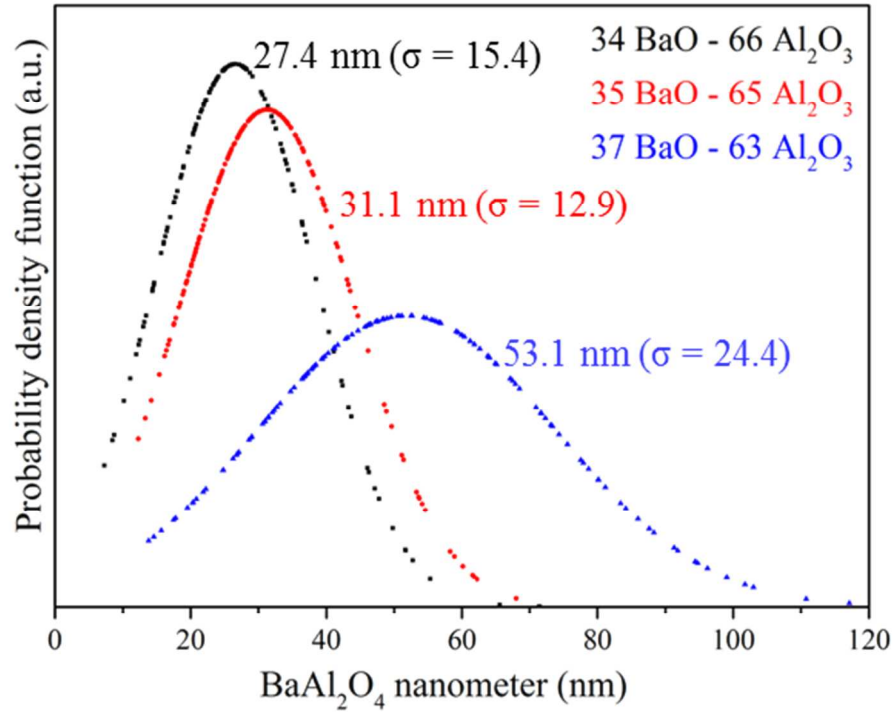

**Figure S13:** Normal distribution of  $\text{BaAl}_2\text{O}_4$  nanoparticles sizes, for the 34BaO-66 $\text{Al}_2\text{O}_3$ , 35BaO-65 $\text{Al}_2\text{O}_3$ , and 37BaO-63 $\text{Al}_2\text{O}_3$  polycrystalline ceramic compositions. The diameters were determined from TEM patterns.

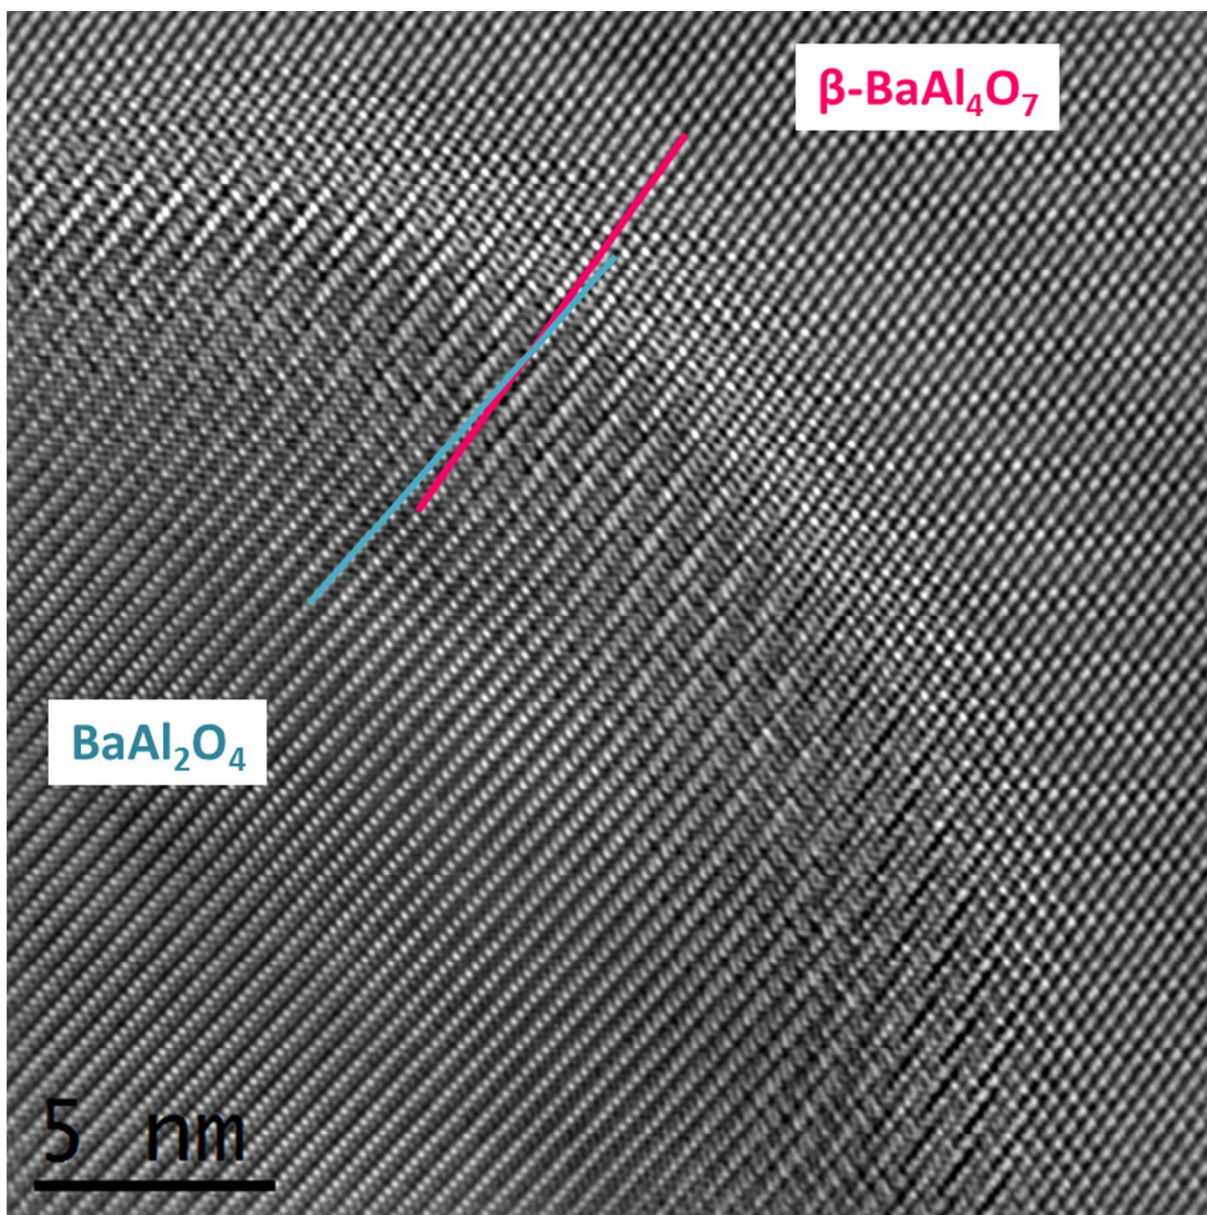

**Figure S14:** Filtered HRTEM image of a  $\text{BaAl}_2\text{O}_4$  nanoparticle into a  $\text{BaAl}_4\text{O}_7$  grain, with a  $6^\circ$  misfit between the two crystallographic orientations.

$$n_x = -3.79 \times 10^{-12} \lambda^2 + 1.5866 + \frac{8934.6}{\lambda^2} + \frac{2.72 \times 10^8}{\lambda^4}$$

$$n_y = -2.97 \times 10^{-12} \lambda^2 + 1.5960 + \frac{8939.5}{\lambda^2} + \frac{2.46 \times 10^8}{\lambda^4}$$

$$n_z = -9.02 \times 10^{-12} \lambda^2 + 1.5871 + \frac{9090.2}{\lambda^2} + \frac{3.71 \times 10^8}{\lambda^4}.$$

**Figure SI5:** Expression of the refractive index components of  $\beta$ -BaAl<sub>4</sub>O<sub>7</sub> along the three crystallographic orientations in the 500 – 4000 nm range. These values were obtained from DFT calculations.<sup>28</sup>

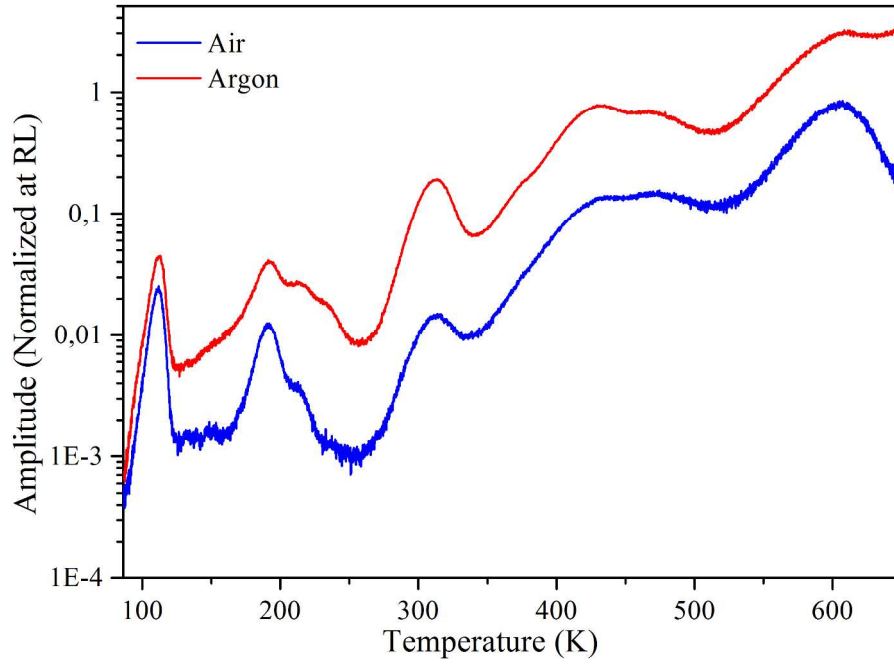

**Figure SI6:** Comparison of TSL from 90 to 670 K for the 34BaAl-66Al<sub>2</sub>O<sub>3</sub> sample grown in air and in argon.
